# Supplementary material for: The Yersinia enterocolitica Ysa type III secretion system is expressed during infections both in vitro and in vivo
Source: PubMed Central journal article supplement (PMC3892342; doi:10.1002/mbo3.136), 2013-10-24

Figure S2

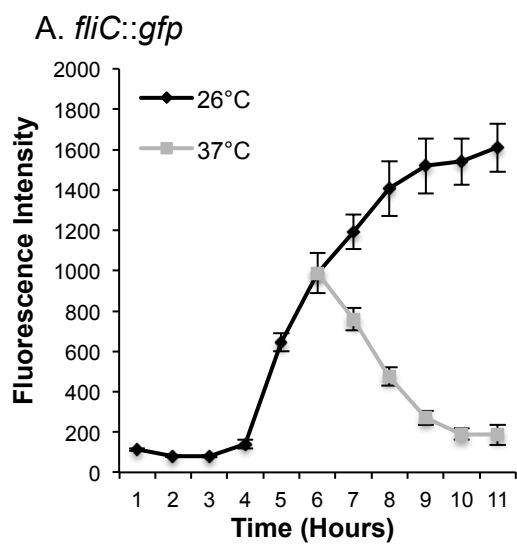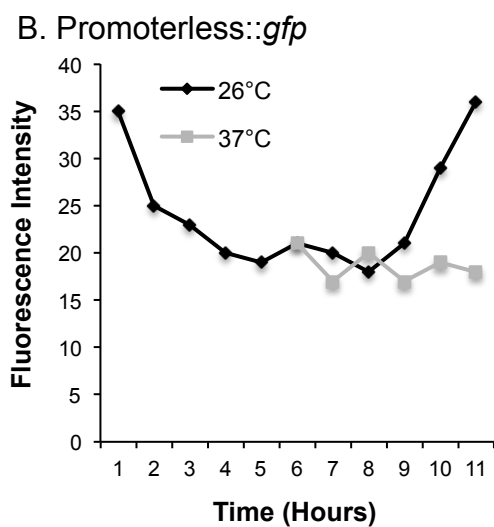

Supplement: mbo30002-0962-SD4.pdf [file mbo30002-0962-SD4.pdf]
