# Supplementary material for: The Yersinia enterocolitica Ysa type III secretion system is expressed during infections both in vitro and in vivo
Source: PubMed Central journal article supplement (PMC3892342; doi:10.1002/mbo3.136), 2013-10-24
Supplement: mbo30002-0962-SD5.pdf [file mbo30002-0962-SD5.pdf]

**Supplementary Table 1:** Bacterial strains and plasmids used in this study

| <b>Strain or Plasmid</b>        | <b>Description</b>                                                               | <b>Reference</b>                   |
|---------------------------------|----------------------------------------------------------------------------------|------------------------------------|
| <b><i>Y. enterocolitica</i></b> |                                                                                  |                                    |
| JB580v                          | Serogroup O:8, Nal, $\Delta$ <i>yenR</i> (R- M+)                                 | Kinder et al., 1993                |
| GY5718                          | JB580v $\Delta$ <i>blaA</i> , $\Delta$ <i>blaB</i>                               | Bent and Young, 2010               |
| GY6267                          | GY5718 pYV-                                                                      | This Study                         |
| GY6397                          | GY5718 <i>rscB</i> ::pEP185.2                                                    | This Study                         |
| GY6398                          | GY5718 <i>ysrS</i> ::pEP185.2                                                    | This Study                         |
| GY6399                          | GY5718 $\Delta$ <i>ysaE</i>                                                      | This Study                         |
| <b><i>E. coli</i></b>           |                                                                                  |                                    |
| DH5 $\alpha$                    | F- $\phi$ 80 <i>dlacZ</i> M15 ( <i>lacZYA-argF</i> )U169 <i>deoR recA1 endA1</i> | Life Technologies                  |
| S17-1 $\lambda$ <i>pir</i>      | <i>recA thi pro hsdR- hsdM+</i> RP4::2-Tc::Mu::Km Tn7 $\lambda$ <i>pir</i>       | Miller and Mekalanos, 1988         |
| <b>Plasmids</b>                 |                                                                                  |                                    |
| pSRB1                           | <i>pfliC</i> :: <i>gfp</i>                                                       | Cummings et al., 2006              |
| pDW5                            | <i>ptetA</i> :: <i>gfp</i>                                                       | Cummings et al., 2006              |
| pDW6                            | Promoterless <i>gfp</i>                                                          | Cummings et al., 2006              |
| pGY435                          | Ca. 0.5-kb fragment of <i>rscB</i> in pEP185.2                                   | Venecia and Young, 2005            |
| pGY518                          | pEP185.2 $\Delta$ <i>ysaE</i>                                                    | B. Young and G. Young, Unpublished |
| pGY526                          | Ca. 0.5-kb fragment of <i>ysrS</i> in pEP185.2                                   | Venecia and Young, 2005            |
| pGY996                          | pDW6:: <i>orf6</i>                                                               | This Study                         |
| pGY1045                         | pDW6:: <i>yspP</i>                                                               | This Study                         |
| pGY1049                         | pDW6:: <i>yopH</i>                                                               | This Study                         |

**Supplementary Table 2:** Primers used in this study

| <b>Primer</b>       | <b>Sequence</b>                    |
|---------------------|------------------------------------|
| <b>Cloning</b>      |                                    |
| <i>ysaE/orf6</i> -F | 5' – AGATCTGTAATCACCTCAGCGTTG – 3' |
| <i>ysaE/orf6</i> -R | 5' – AGATCTTATTGACCAGCGACTTGC – 3' |
| <i>PyspP</i> -F     | 5' – GGATCCCGCAATAGCATTGCCAC – 3'  |
| <i>PyspP</i> -R     | 5' – TCTAGACATTTCAGGTGTTGGGGC – 3' |
| <i>PyopH</i> -F     | 5' – ACATCTCTGACGATGAAGATC – 3'    |
| <i>PyopH</i> -R     | 5' – GCTTCCCTCCTTAATTAATAAG – 3'   |
| <b>qRT-PCR</b>      |                                    |
| <i>yspP</i> -F      | 5' – ACATCGCCCCAACACCTG – 3'       |
| <i>yspP</i> -R      | 5' – TGTCCTGAAGTTAATCCCCGG – 3'    |
| <i>yopH</i> -F      | 5' – GTTGGAGGCTGCATTGCG – 3'       |
| <i>yopH</i> -R      | 5' – TGCGGTGGCTCTGACTTC – 3'       |
| <i>dnaK</i> -F      | 5' – CGAACCAACAGCTGCTGC – 3'       |
| <i>dnaK</i> -R      | 5' – TCAGGCGGCTATCGAAGTC – 3'      |
